# Supplementary material for: Low band gap dithienogermolodithiophene copolymers with tunable acceptors and side-chains for organic solar cells
Source: Royal Society of Chemistry journal article supplement (doi:10.1039/c3ta13778c), 2013-01-01
Supplement: c3ta13778c.pdf [file c3ta13778c.pdf]

## Supporting Information

# Low Band Gap Dithenogermolodithiophene Copolymers with Tunable Acceptors and Side-chains for Organic Solar Cells

Hongliang Zhong,<sup>a</sup> Zhe Li,<sup>a</sup> Ester Buchaca-Domingo,<sup>b</sup> Stephan Rossbauer,<sup>c</sup> Scott E. Watkins,<sup>d</sup> Natalie Stingelin,<sup>b</sup> Thomas D. Anthopoulos,<sup>c</sup> and Martin Heeney\*<sup>a</sup>

<sup>a</sup> Dept. Chemistry and Centre for Plastic Electronics, Imperial College London, London, SW7 2AZ, U.K. E-mail: m.heeney@imperial.ac.uk

<sup>b</sup> Dept. Materials and Centre for Plastic Electronics, Imperial College London, London, SW7 2AZ, U.K.

<sup>c</sup> Dept. Physics and Centre for Plastic Electronics, Imperial College London, London, SW7 2AZ, U.K.

<sup>d</sup> CSIRO, Molecular and Health Technologies, VIC 3169, Australia

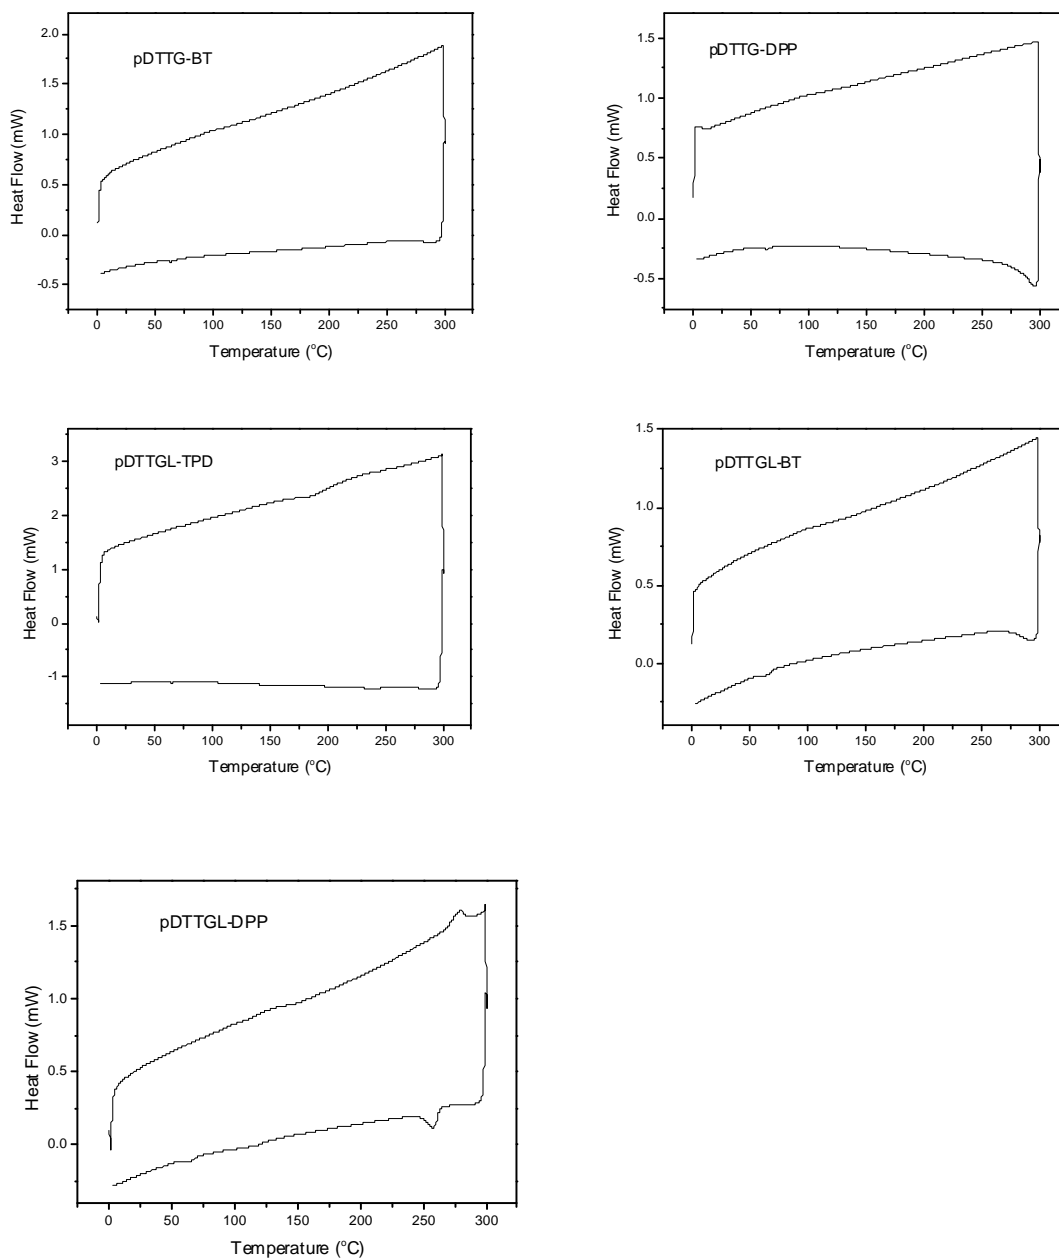

**Figure S1.** DSC curves of polymers.

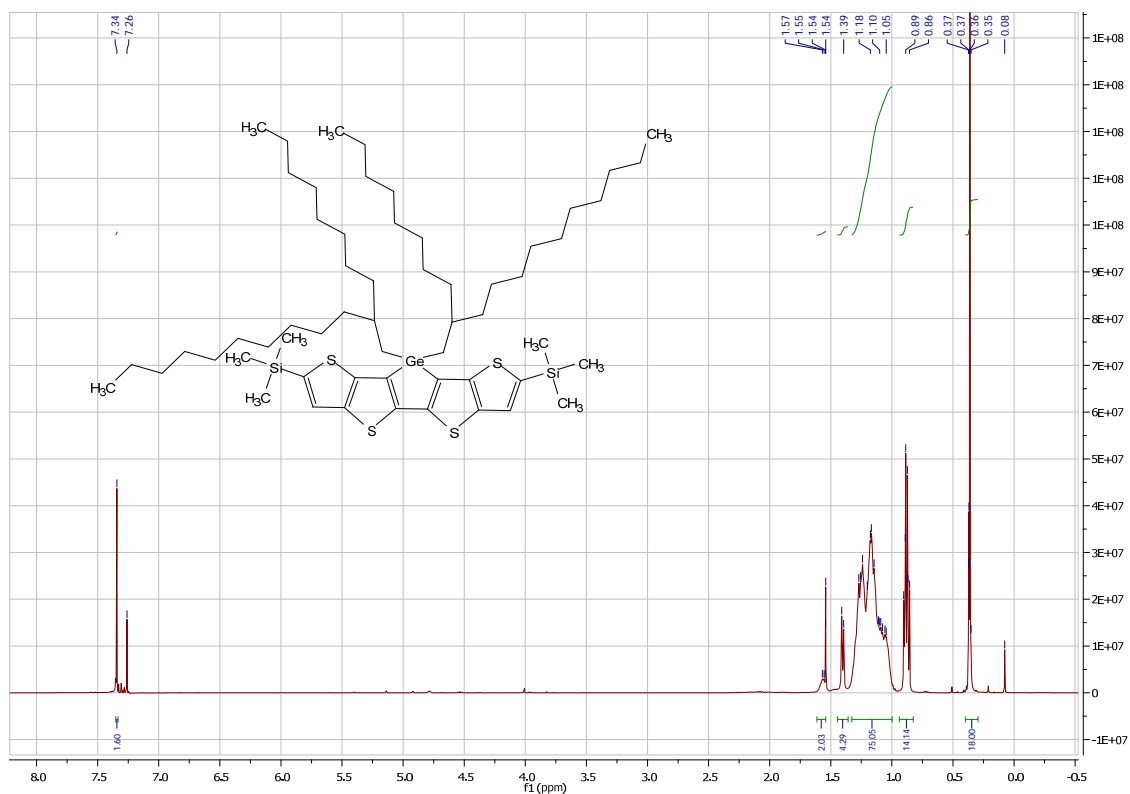

Figure S2.  $^1\text{H}$  NMR spectrum of compound **2b** in  $\text{CDCl}_3$  at room temperature.

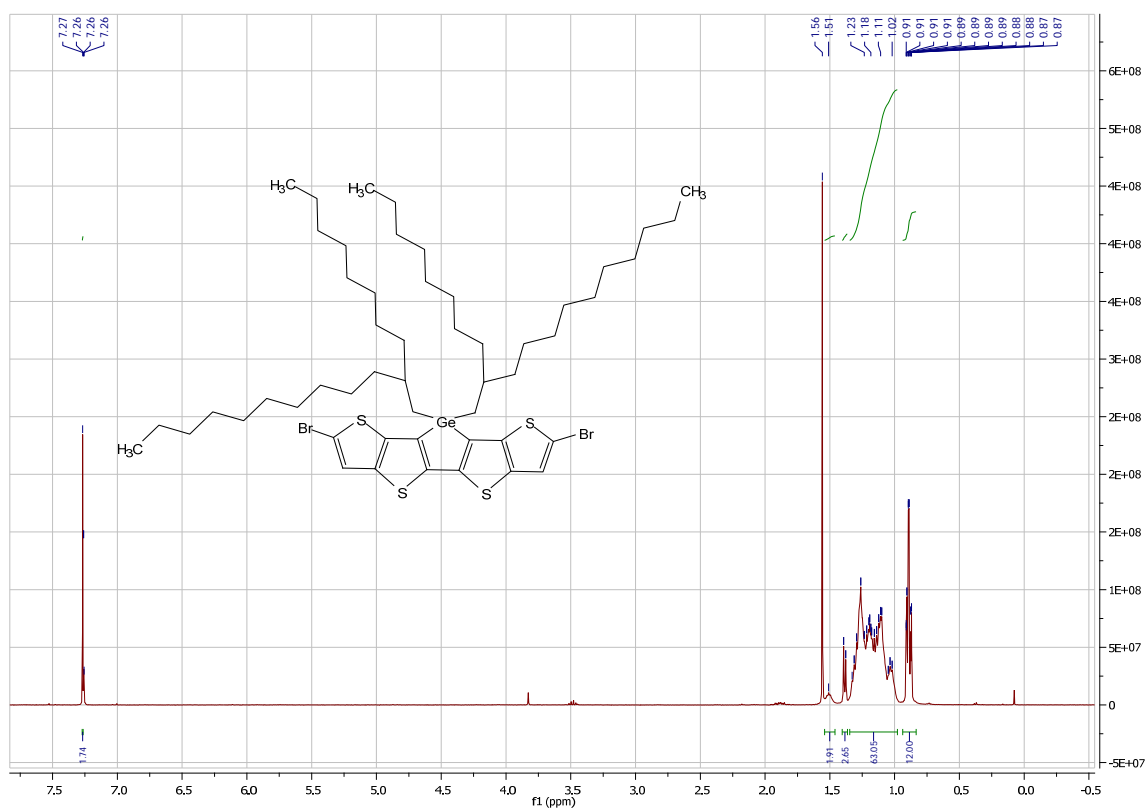

Figure S3.  $^1\text{H}$  NMR spectrum of compound **3b** in  $\text{CDCl}_3$  at room temperature.

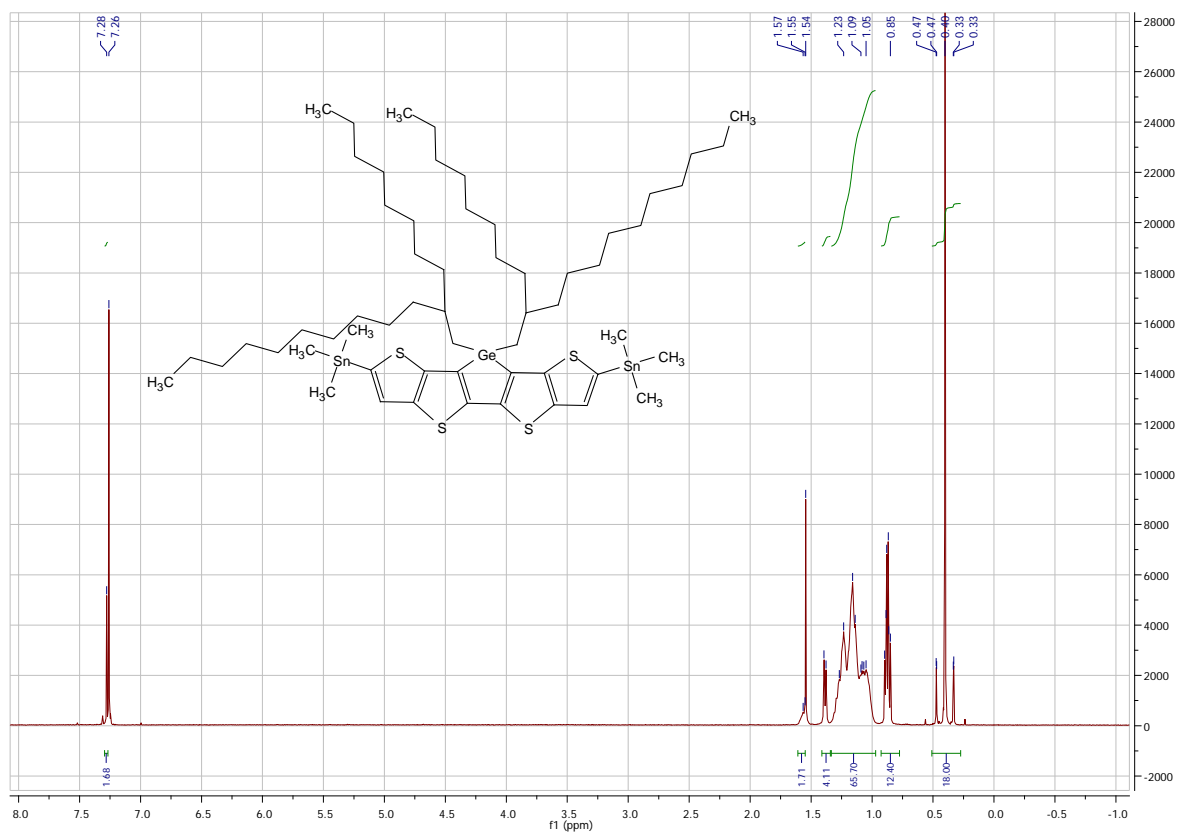

Figure S4.  $^1\text{H}$  NMR spectrum of compound **4b** in  $\text{CDCl}_3$  at room temperature.

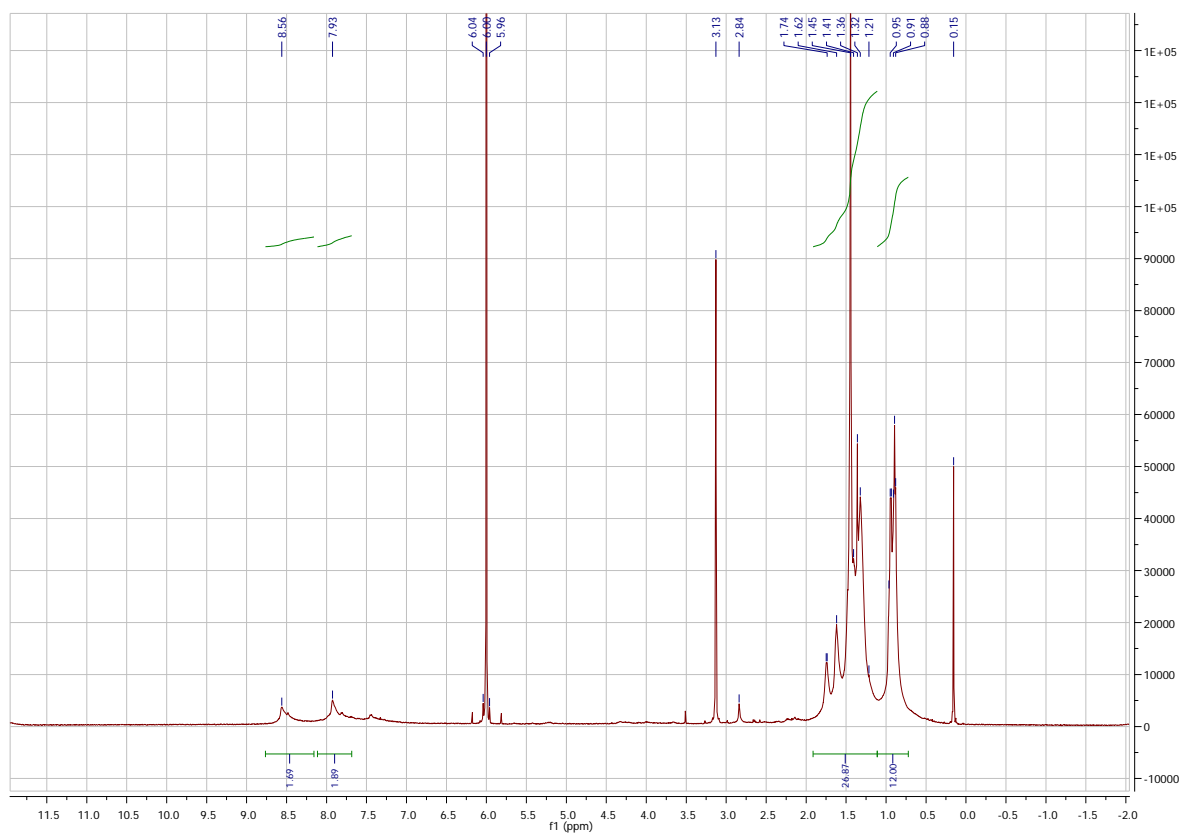

Figure S5.  $^1\text{H}$  NMR spectrum of **pDTTG-BT** in  $d_4$ -tetrachloroethane at  $130\text{ }^\circ\text{C}$ .

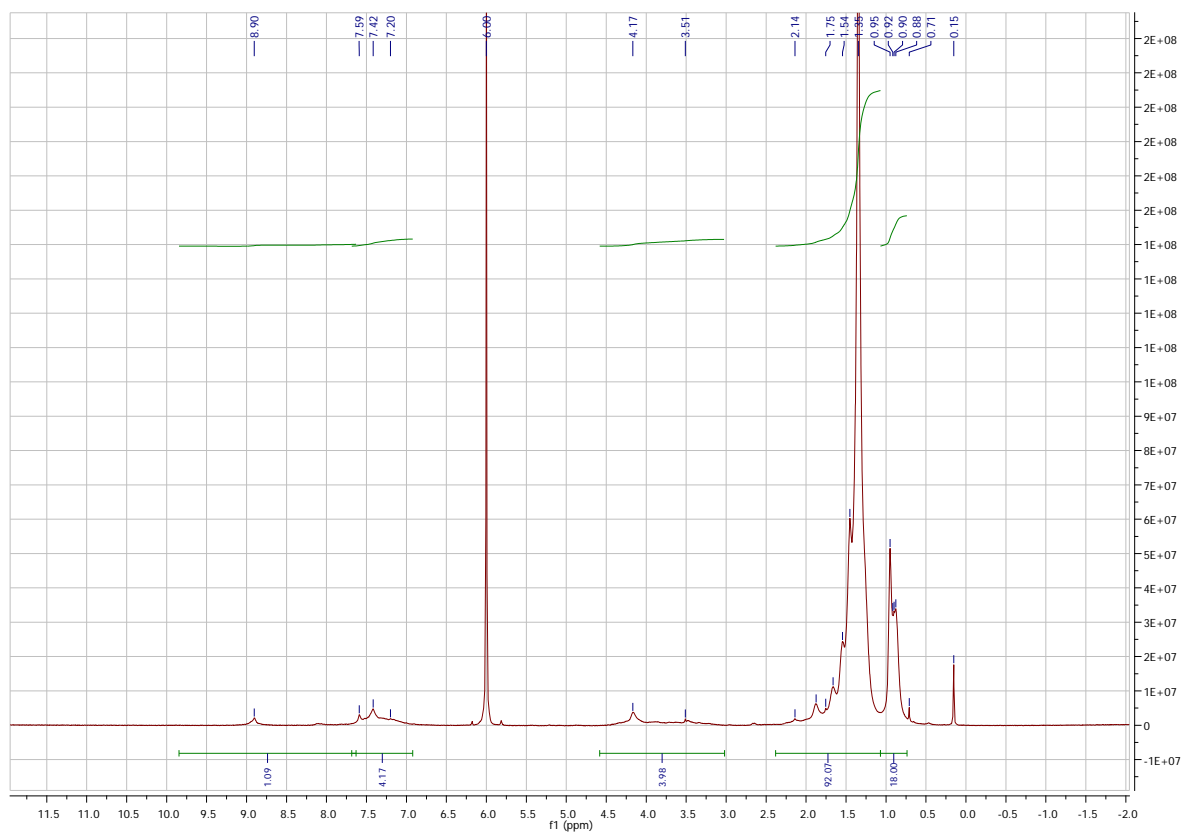

Figure S6.  $^1\text{H}$  NMR spectrum of pDTTG-DPP in  $d_4$ -tetrachloroethane at 130 °C.

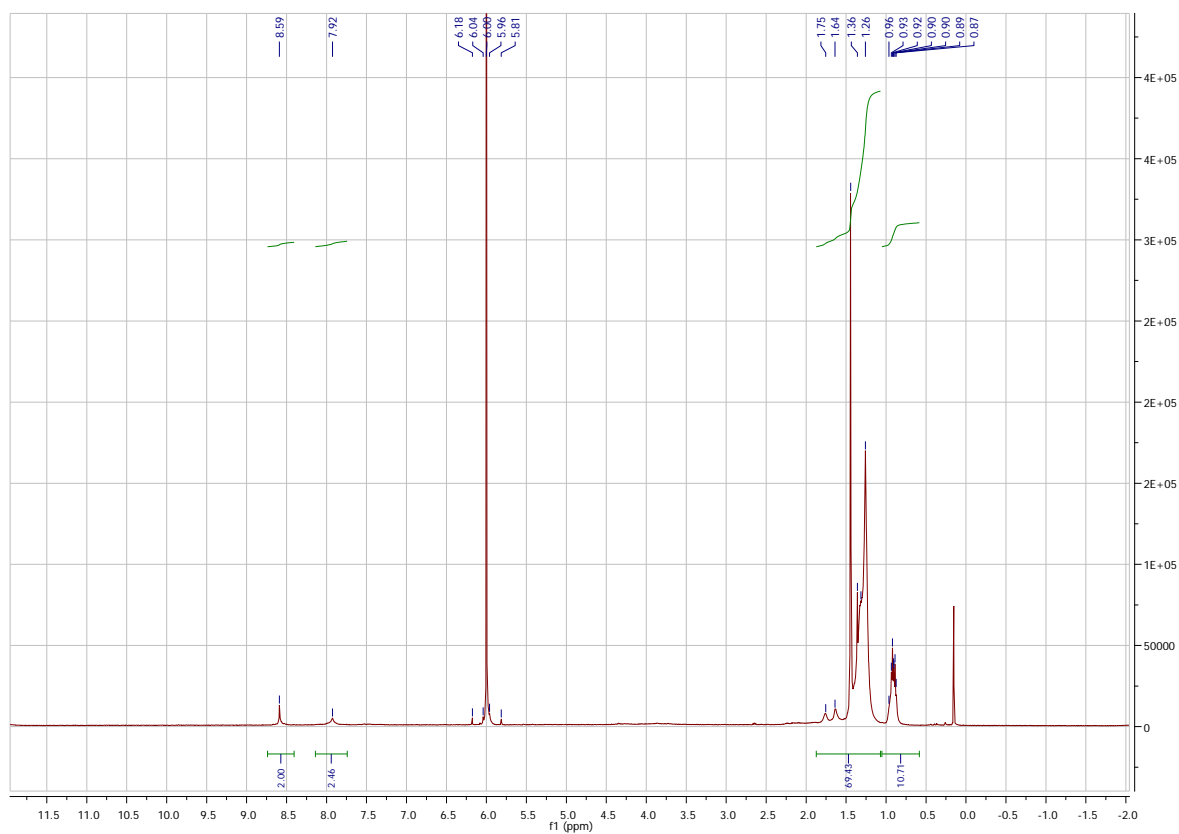

Figure S7.  $^1\text{H}$  NMR spectrum of pDTTGL-BT in  $d_4$ -tetrachloroethane at 130 °C.

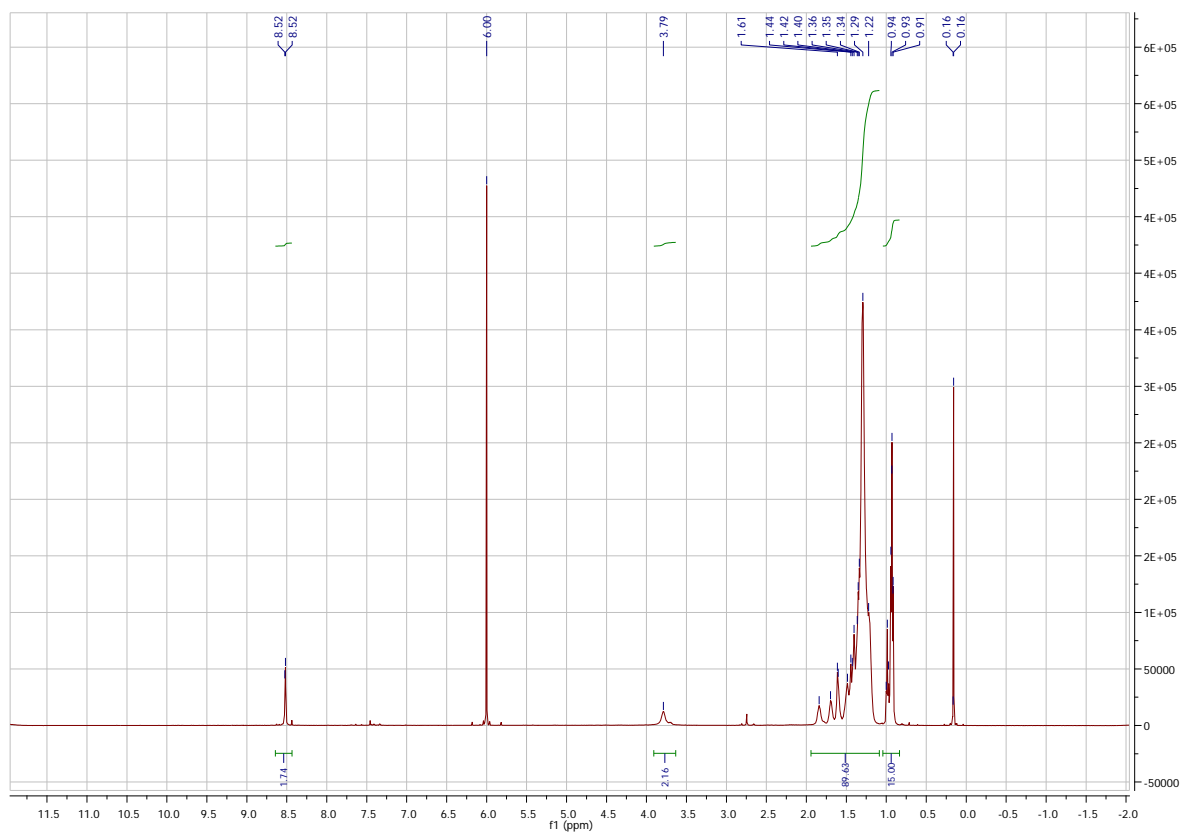

Figure S8. <sup>1</sup>H NMR spectrum of pDTTGL-TPD in d<sub>4</sub>-tetrachloroethane at 130 °C.

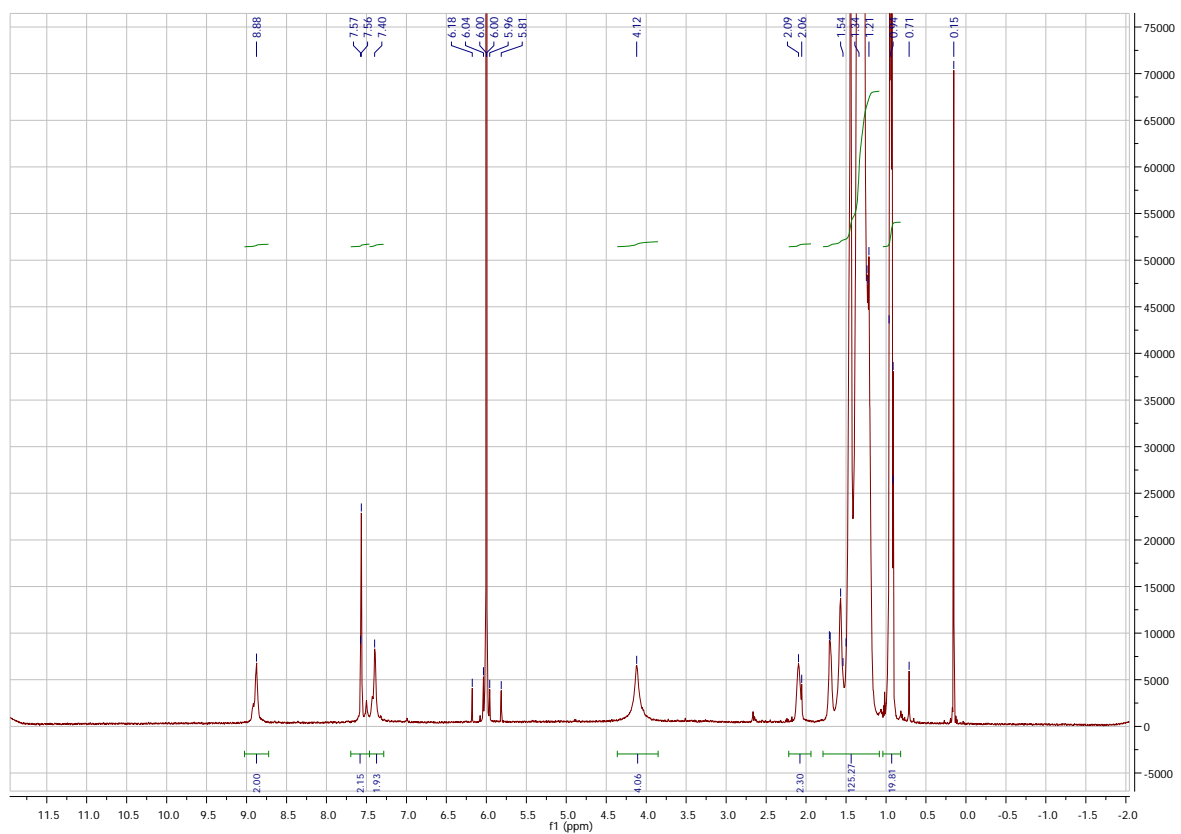

Figure S9. <sup>1</sup>H NMR spectrum of pDTTGL-DPP in d<sub>4</sub>-tetrachloroethane at 130 °C.
